# Supplementary material for: Nano-silicon enhances tomato growth and antioxidant defense under salt stress
Source: Royal Society of Chemistry journal article supplement (doi:10.1039/d4en00770k), 2024-10-07
Supplement: d4en00770k1.pdf [file d4en00770k1.pdf]

# Nano-silicon enhances tomato growth and antioxidant defense under salt stress

Shuaibing Wang <sup>a</sup>, Xiang Shen <sup>b</sup>, Xin Guan <sup>a</sup>; Li Sun <sup>a</sup>, Zhongxue Yang <sup>b</sup>, Dandan Wang <sup>a</sup>, Yinglong Chen <sup>c</sup>, Peiqiang Li <sup>b, \*</sup>, Zhihong Xie <sup>a, \*</sup>

<sup>a</sup> National Engineering Research Center for Efficient Utilization of Soil and Fertilizer Resources, College of Resources and Environment, Shandong Agricultural University, Tai'an City, Shandong, 271018, China

<sup>b</sup> College of Chemistry and Materials Science, Shandong Agricultural University, Tai'an City, Shandong, 271018, China

<sup>c</sup> The UWA Institute of Agriculture, & School of Agriculture and Environment, The University of Western Australia, Perth 6009, Australia

Corresponding author: Zhihong Xie: Email: zhihongxie211@163.com, Peiqiang Li: Email: pqli@sdau.edu.cn

## Tomato seed germination experiment (preliminary experiment):

Tomato seeds (*Solanum lycopersicum* L.) were surface-sterilized using 10% NaClO solution for 10 min and subsequently washed several times with sterile water. The seeds under above treatments were placed on a petri dish that was lined two layers of circular filter paper (NaCl 150mM). Then eight doses (0, 5, 50, 100, 200, 300, 400, 500 and 1000 mg·L<sup>-1</sup>) of Na<sub>2</sub>SiO<sub>3</sub>·9H<sub>2</sub>O (Na<sub>2</sub>SiO<sub>3</sub>) and silicon nanoparticles (SiNPs) were respectively added for 15 mL, 15 mL 100 mM NaCl solution was set as a control. Each treatment was repeated three times. 20 seeds were placed in each petri dish and incubated in a constant temperature incubator at 25 °C for 10 days, making sure damp filter paper all the time without solution accumulation when tilted. When the length of emergent radicle was ≥ 2 mm, the number of germinated seeds

was recorded every day, and samples collected for determination and calculation at 10 d.

### Figures:

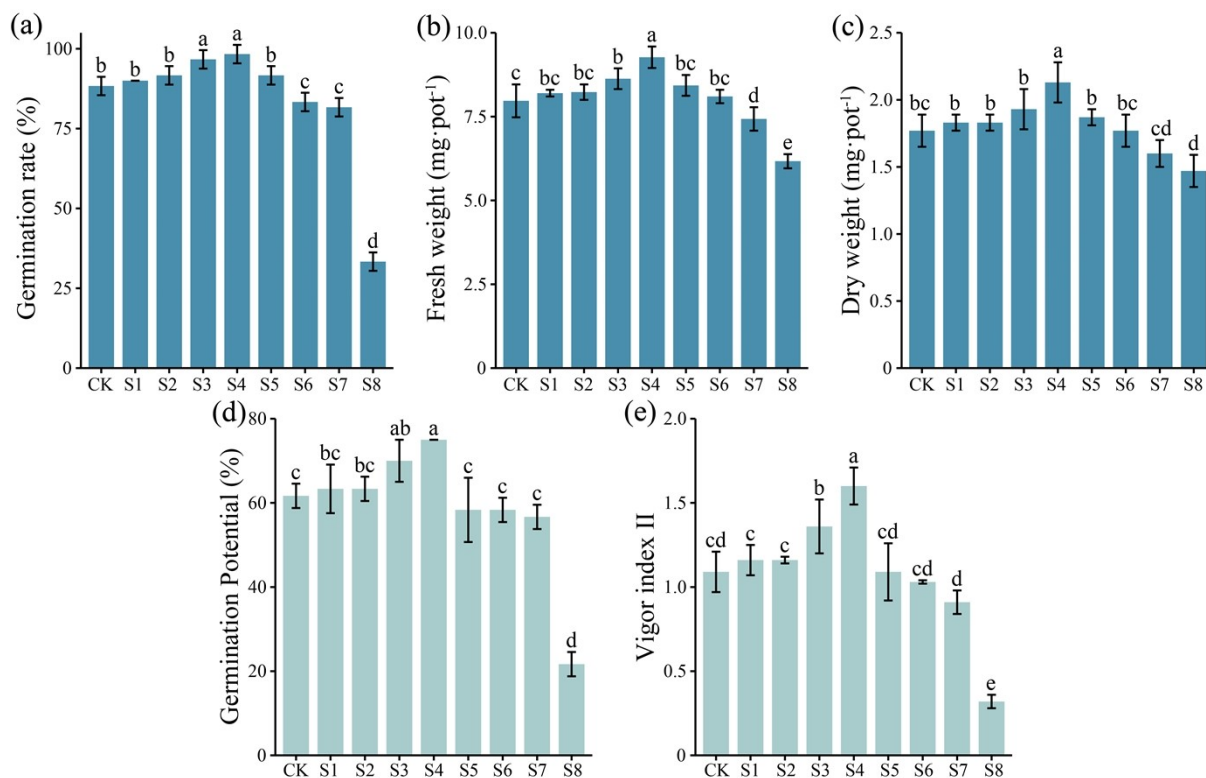

Fig. S1 The effects of different Si doses on germination rate (a), fresh weight (b), dry weight (c), germination potential (d) and vigor index II (e) of tomato seeds. CK, 100 mM NaCl; S1, 5 mg·mL<sup>-1</sup> Na<sub>2</sub>SiO<sub>3</sub>; S2, 50 mg·mL<sup>-1</sup> Na<sub>2</sub>SiO<sub>3</sub>; S3, 100 mg·mL<sup>-1</sup> Na<sub>2</sub>SiO<sub>3</sub>; S4, 200 mg·mL<sup>-1</sup> Na<sub>2</sub>SiO<sub>3</sub>; S5, 300 mg·mL<sup>-1</sup> Na<sub>2</sub>SiO<sub>3</sub>; S6, 400 mg·mL<sup>-1</sup> Na<sub>2</sub>SiO<sub>3</sub>; S7, 500 mg·mL<sup>-1</sup> Na<sub>2</sub>SiO<sub>3</sub>; S8, 1000 mg·mL<sup>-1</sup> Na<sub>2</sub>SiO<sub>3</sub>. The data are the mean values + SD of three individual replications, and different letters show significant differences ( $P < 0.05$ ).

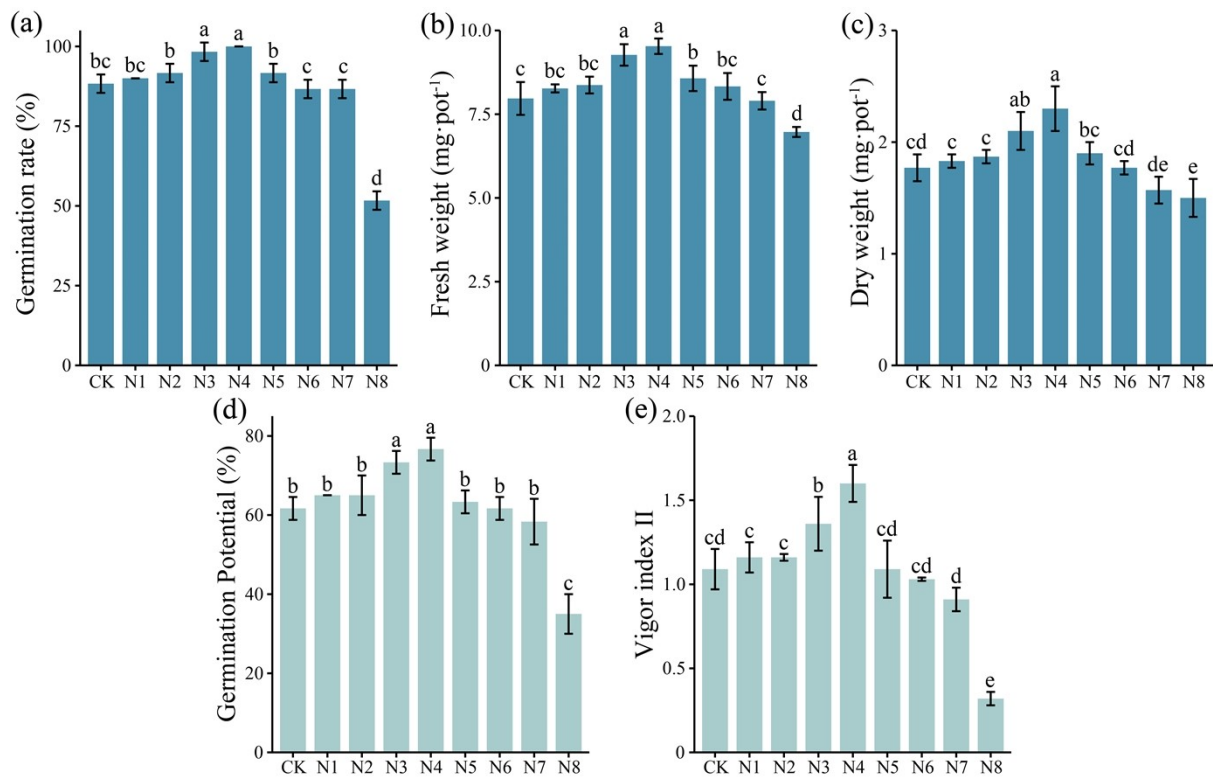

Fig. S2 The effect of different SiNPs doses on germination rate (a), fresh weight (b), dry weight (c), germination potential (d) and vigor index II (e) of tomato seeds. CK, 100 mM NaCl; N1, 5 mg·mL<sup>-1</sup> SiNPs; N2, 50 mg·mL<sup>-1</sup> SiNPs; N3, 100 mg·mL<sup>-1</sup> SiNPs; N4, 200 mg·mL<sup>-1</sup> SiNPs; N5, 300 mg·mL<sup>-1</sup> SiNPs; N6, 400 mg·mL<sup>-1</sup> SiNPs; N7, 500 mg·mL<sup>-1</sup> SiNPs; N8, 1000 mg·mL<sup>-1</sup> SiNPs. The data are the mean values + SD of three individual replications, and different letters show significant differences ( $P < 0.05$ ).

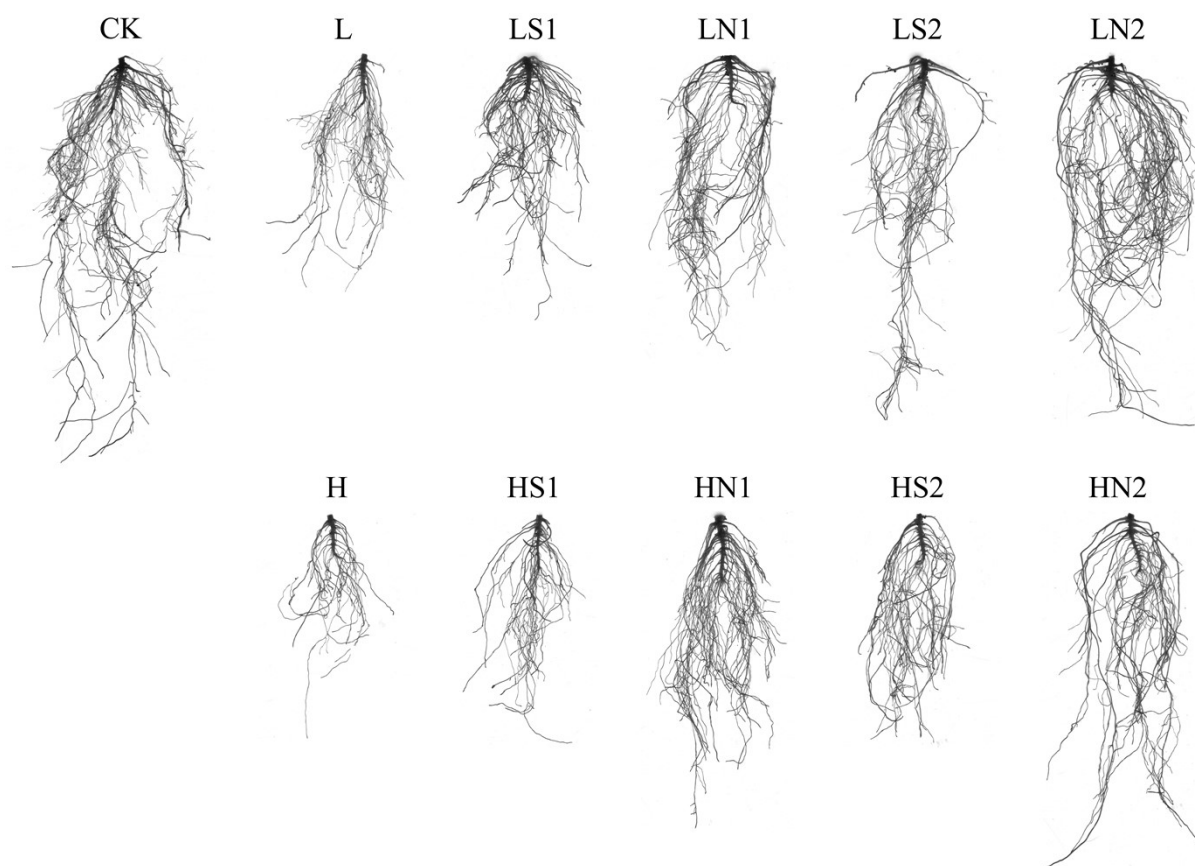

Fig. S3 Effects of  $\text{Na}_2\text{SiO}_3$  and SiNPs at two different concentrations (100 and 200  $\text{mg}\cdot\text{L}^{-1}$ ) on root morphology of tomato plants under salt stress.

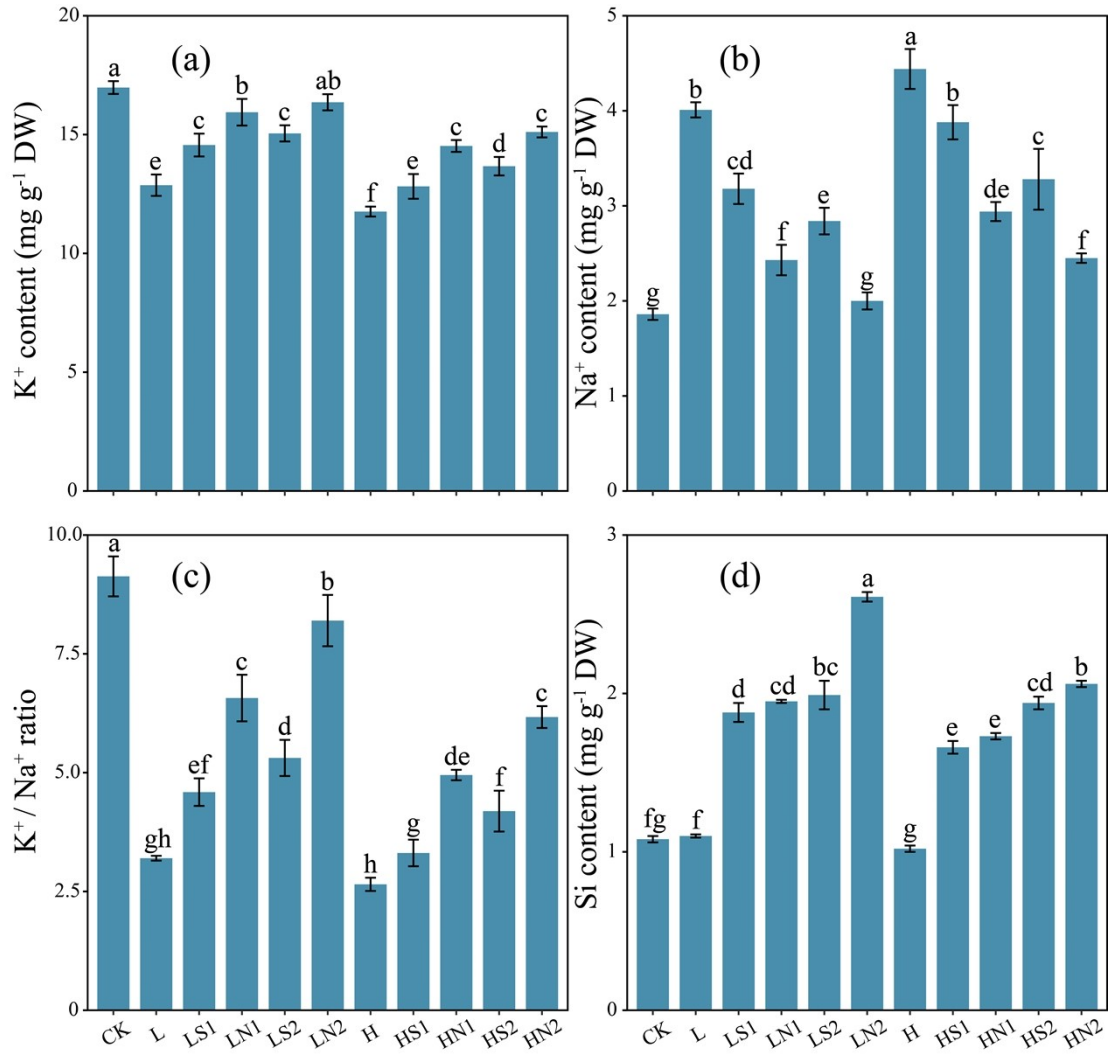

Fig. S4 Effects of  $\text{Na}_2\text{SiO}_3$  and SiNPs at two different concentrations (100 and 200  $\text{mg}\cdot\text{L}^{-1}$ ) on the contents of  $\text{Na}^+$ ,  $\text{K}^+$  and Si in tomato seedlings. (a)  $\text{K}^+$  content; (b)  $\text{Na}^+$  content; (c)  $\text{K}^+ / \text{Na}^+$  ratio; (d) Silicon content. The data were the mean values + SD of three individual replications, and different letters show significant differences ( $P < 0.05$ ).

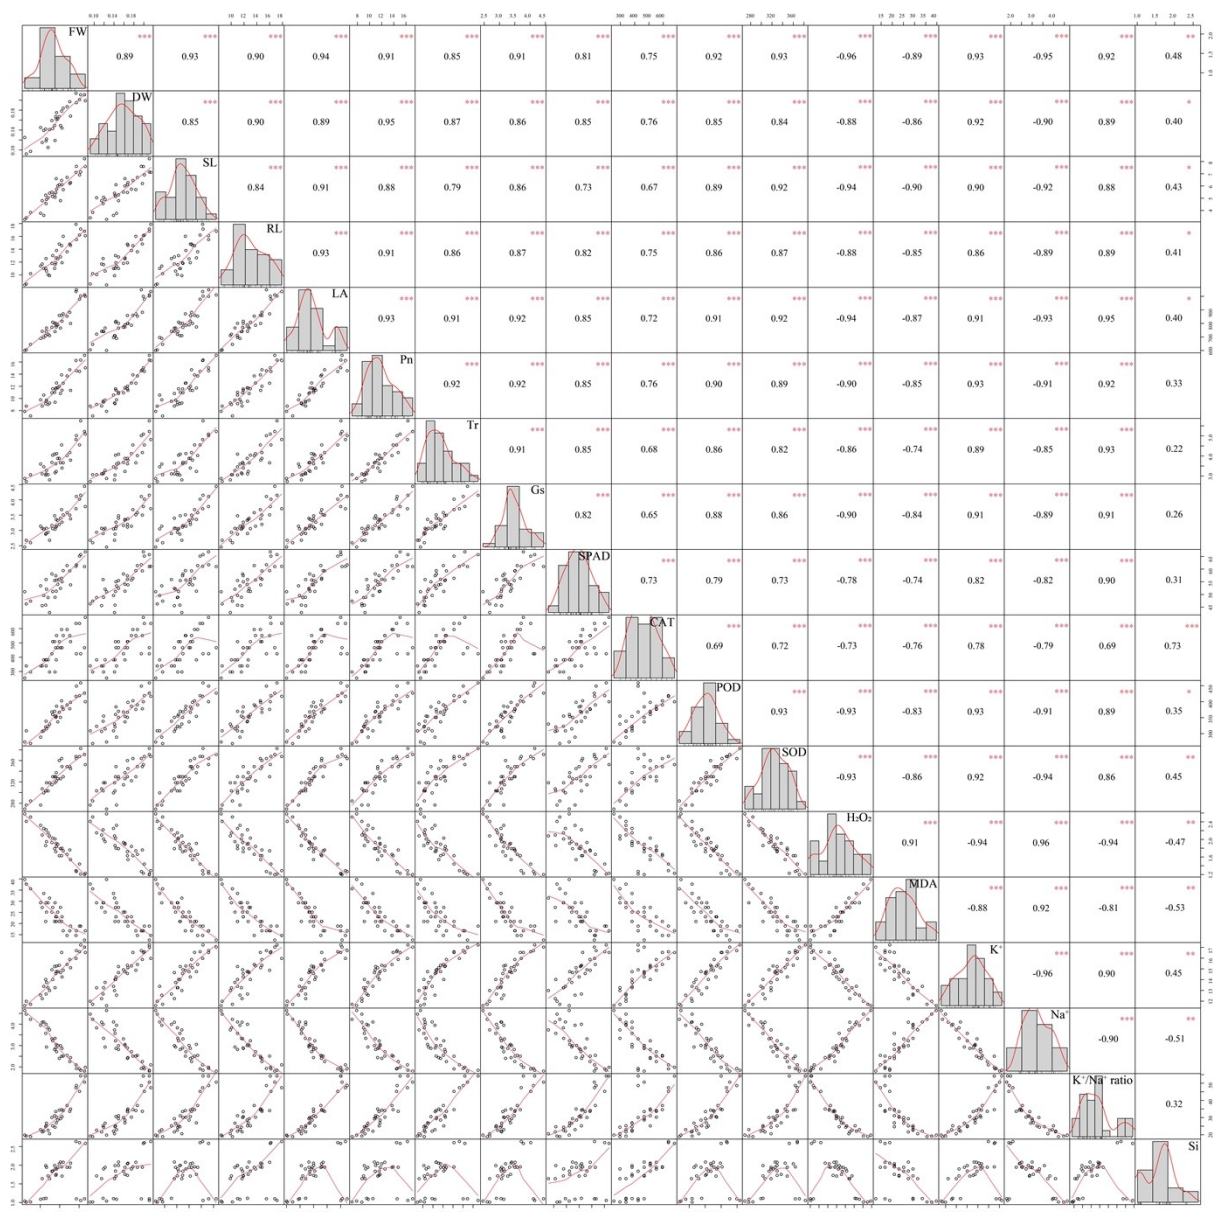

Fig. S5 Correlation analysis between tomato growth parameters, antioxidant system and the contents of Na<sup>+</sup>, K<sup>+</sup>, Si. FW, fresh weight; DW, dry weight; SL, shoot length; RL, root length; LA, leaf area; Pn, net photosynthetic rate; Tr, transpiration rate; Gs, stomatal conductance; SPAD, chlorophyll content (SPAD); CAT, catalase activity; POD, peroxidase activity; SOD, superoxide dismutase activity; H<sub>2</sub>O<sub>2</sub>, hydrogen peroxide content; MDA, malondialdehyde content. The number in the figure represent the correlation coefficients, \*,  $P < 0.05$ ; \*\*,  $P < 0.01$ ; \*\*\*,  $P < 0.001$ .

**Tables:**

Table S1. Calculation method of tomato seed germination parameters.

| Germination character | Unit | Formula                    | Description                                                                       |
|-----------------------|------|----------------------------|-----------------------------------------------------------------------------------|
| Germination rate      | %    | $\frac{G_{10}}{TNP} * 100$ | $G_{10}$ = 10 d number of germinated seeds<br>TNP = total number of planted seeds |
| Germination potential | %    | $\frac{G_3}{TNP} * 100$    | $G_3$ = 3 d number of germinated seeds<br>TNP= total number of planted seeds      |
| Vigor index II        | -    | $\frac{SDM * GP}{100}$     | SDM=seedling dry mass (g)<br>GP = Germination Potential (%).                      |

Table S2. Primers used for qRT-PCR analysis in the present study.

| Gene name      | Forward primer (5' to 3')   | Reverse primer (5' to 3')   |
|----------------|-----------------------------|-----------------------------|
| <i>SlActin</i> | GGGATGGAGAAGTTTGGTGGTG<br>G | CTTCGACCAAGGGATGGTGTAGC     |
| <i>SICAT</i>   | CGCATACGACACCCCTTTC         | CGGAGAAAATCAGCACAAGTAA<br>G |
| <i>SIPOD</i>   | CTTGCCCTAATGCTCTCACC        | GCATCACAACCCTGAACAAA        |
| <i>SISOD</i>   | TCACCACAACCAGCACTACCA       | AGTGACAACCCCTCAACATTAG      |
| <i>SISPDS2</i> | CTTTGGCCTGGGGAAGCAC         | ATCCAAAACAAGCACCTTCCCA      |
| <i>SINHXI</i>  | GGATGGGAAGGAGAATAATG        | TGATGTAGGAGGTTGAGAG         |

|               |                        |                        |
|---------------|------------------------|------------------------|
| <i>SINHX2</i> | ATACAGAAACCAGCATTAGGGC | CAAGGTAAACCAGAATGCCAGT |
| <i>SILsi1</i> | ATGGAGTTTTTGAGTCTTCTGC | GCTGCGTTTCTGGCTTAGG    |

Table S3. The effects of Na<sub>2</sub>SiO<sub>3</sub> and SiNPs on root basic indicators of tomato seedlings.

| Treatments | Total root length<br>(cm) | Root surface area<br>(cm <sup>2</sup> ) | Root volume<br>(cm <sup>3</sup> ) | Mean root diameter<br>(mm) |
|------------|---------------------------|-----------------------------------------|-----------------------------------|----------------------------|
| CK         | 982.72 ± 29.00 b          | 355.48 ± 13.31 b                        | 10.94 ± 0.36 b                    | 1.01 ± 0.06 bc             |
| L          | 546.33 ± 30.87 f          | 187.50 ± 8.24 f                         | 4.67 ± 0.16 g                     | 0.68 ± 0.02 g              |
| LS1        | 625.02 ± 26.37 e          | 224.99 ± 12.35 e                        | 5.47 ± 0.18 ef                    | 0.97 ± 0.01 cd             |
| LN1        | 841.35 ± 36.40 a          | 280.71 ± 9.90 c                         | 6.28 ± 0.10 d                     | 1.04 ± 0.02 b              |
| LS2        | 702.55 ± 19.63 d          | 248.14 ± 9.00 d                         | 5.63 ± 0.21 e                     | 0.99 ± 0.01 cd             |
| LN2        | 1168.55 ± 27.24 a         | 391.36 ± 12.61 a                        | 12.20 ± 0.57 a                    | 1.10 ± 0.03 a              |
| H          | 399.15 ± 15.20 g          | 150.69 ± 10.72 g                        | 3.68 ± 0.30 h                     | 0.60 ± 0.03 h              |
| HS1        | 512.33 ± 23.75 f          | 175.87 ± 7.98 f                         | 4.77 ± 0.28 g                     | 0.89 ± 0.02 f              |
| HN1        | 677.64 ± 29.21 d          | 214.07 ± 15.70 e                        | 6.17 ± 0.34 d                     | 0.95 ± 0.01 de             |
| HS2        | 609.53 ± 10.96 e          | 186.42 ± 10.03 f                        | 5.08 ± 0.20 fg                    | 0.91 ± 0.04 ef             |
| HN2        | 876.81 ± 20.56 c          | 261.65 ± 7.81 d                         | 8.18 ± 0.34 c                     | 1.00 ± 0.01 bcd            |

The data were the mean values + SD of three individual replications, and different letters showed significant differences ( $P < 0.05$ ).



Table S4. The effects of Na<sub>2</sub>SiO<sub>3</sub> and SiNPs on root architecture parameters of tomato seedlings.

| Treatments | Root links          | Root tips         | Root forks         | Fractal dimension |
|------------|---------------------|-------------------|--------------------|-------------------|
| CK         | 4521.67 ± 106.81 b  | 726.33 ± 31.26 b  | 2584.67 ± 73.10 b  | 1.72 ± 0.02 b     |
| L          | 3062.67 ± 159.52 f  | 403.33 ± 27.57 f  | 1466.00 ± 57.38 f  | 1.48 ± 0.02 f     |
| LS1        | 3477.00 ± 169.50 e  | 451.00 ± 14.42 de | 1814.33 ± 58.07 d  | 1.59 ± 0.03 d     |
| LN1        | 4368.00 ± 107.09 bc | 584.33 ± 21.59 c  | 1978.67 ± 71.22 c  | 1.66 ± 0.02 c     |
| LS2        | 3618.67 ± 205.95 e  | 479.00 ± 18.25 d  | 1922.33 ± 68.07 c  | 1.60 ± 0.02 d     |
| LN2        | 5729.33 ± 195.59 a  | 900.00 ± 41.94 a  | 2710.33 ± 28.75 a  | 1.76 ± 0.01 a     |
| H          | 2682.00 ± 149.90 g  | 341.00 ± 20.66 g  | 1334.33 ± 47.86 g  | 1.40 ± 0.03 g     |
| HS1        | 3084.00 ± 139.54 f  | 416.00 ± 32.60 ef | 1662.67 ± 46.92 e  | 1.52 ± 0.03 e     |
| HN1        | 4040.00 ± 97.53 d   | 485.67 ± 13.32 d  | 1807.67 ± 47.35 d  | 1.60 ± 0.02 d     |
| HS2        | 3422.67 ± 222.32 e  | 432.00 ± 18.36 ef | 1717.00 ± 59.86 de | 1.57 ± 0.02 d     |
| HN2        | 4114.67 ± 118.60 cd | 595.00 ± 18.25 c  | 1984.67 ± 49.24 c  | 1.64 ± 0.02 c     |

The data are the mean values + SD of three individual replications, and different letters show significant differences ( $P < 0.05$ ).
